# Supplementary material for: Implementing a Rural Natural Experiment: A Protocol for Evaluating the Impacts of Food Coops on Food Consumption, Resident’s Health and Community Vitality
Source: Methods Protoc. 2022 Apr 14;5(2):33. doi: 10.3390/mps5020033 (PMC9025453; doi:10.3390/mps5020033)
Supplement: Supplementary file 1 [file mps-05-00033-s001.zip]

Archive with 4 entries (4 files):
- mps-1595146 Document S4-Interview guide.pdf
- mps-1595146 Figure S1-Logic model.png
- mps-1595146 Document S2-Consent form.pdf
- mps-1595146 Document S3-Questionnaire.pdf
